# Supplementary material for: A reliable QSPR model for predicting drug release rate from metal–organic frameworks: a simple and robust drug delivery approach
Source: Royal Society of Chemistry journal article supplement (doi:10.1039/d3ra00070b), 2023-01-01
Supplement: d3ra00070b2.pdf [file d3ra00070b2.pdf]

# Novel QSPR model for predicting drug release rate from metal-organic frameworks: A simple and robust drug delivery approach

Leila Tayebi, Rahmatollah Rahimi, Ali Reza Akbarzadeh\*, Ali Maleki

Department of Chemistry, Iran University of Science and Technology, P.O. Box: 16846-13114, Tehran, Islamic Republic of Iran

\*Corresponding E-mail: a\_akbarzadeh@iust.ac.ir

**Table S. 1.** The structures of organic linkers of MOFs for Training (No: 1-54), Test (No: 55-67), and External validation test sets (No: 68-75).

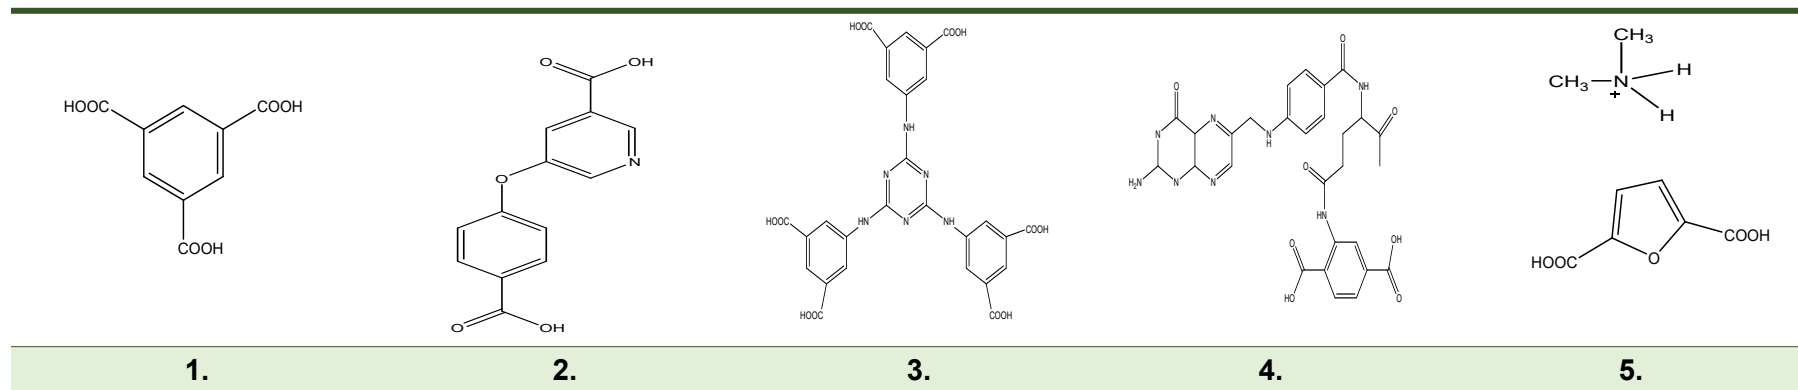

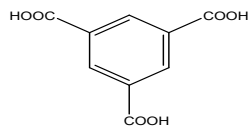

6.

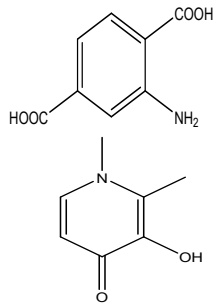

7.

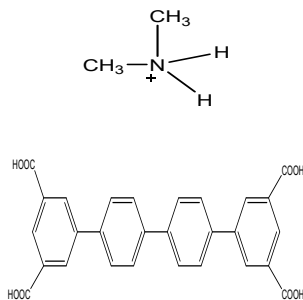

8.

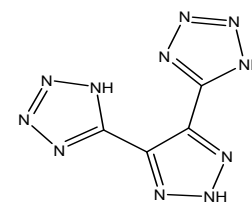

9.

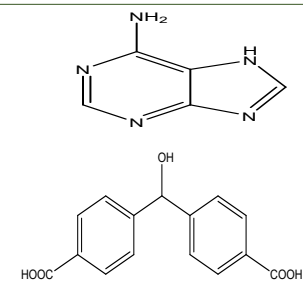

10.

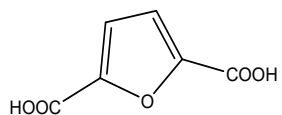

11.

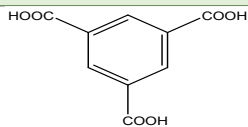

12.

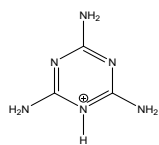

13.

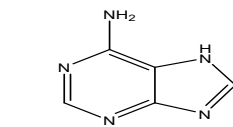

14.

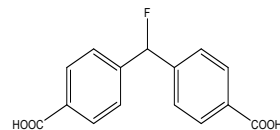

15.

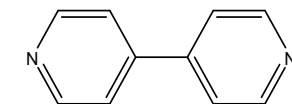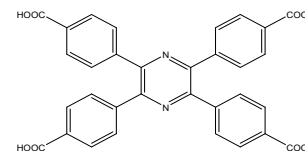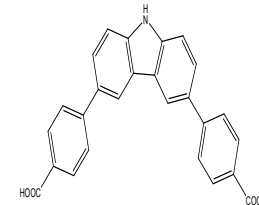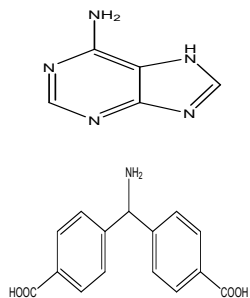

16.

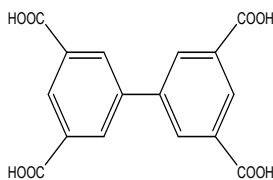

17.

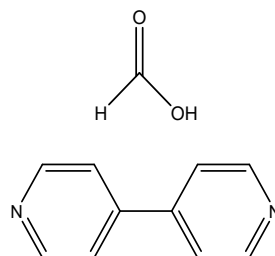

18.

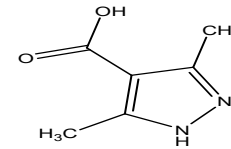

19.

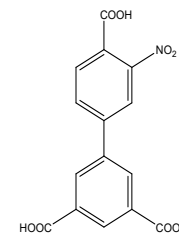

20.

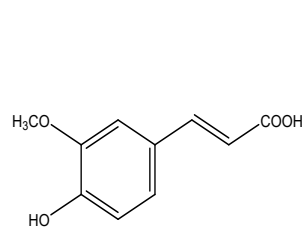

21.

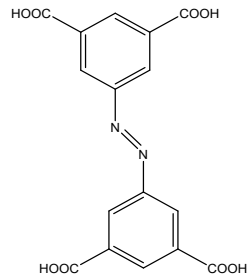

22.

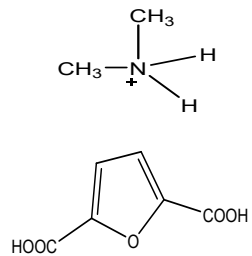

23.

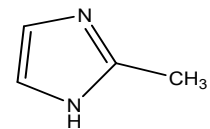

24.

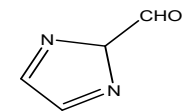

25.

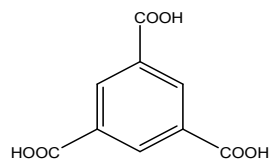

26.

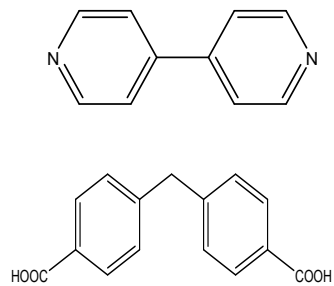

27.

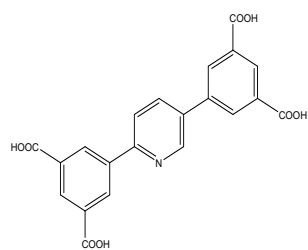

28.

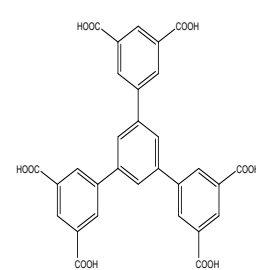

29.

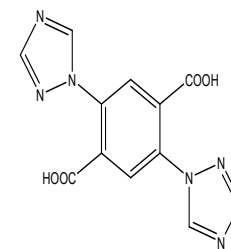

30.

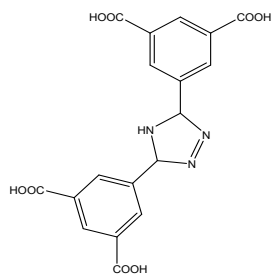

31.

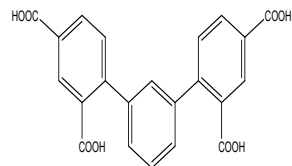

32.

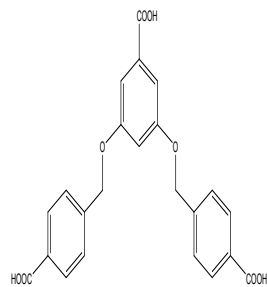

33.

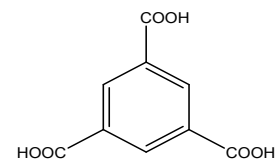

34.

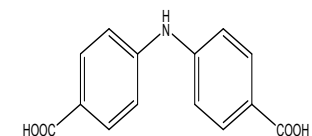

35.

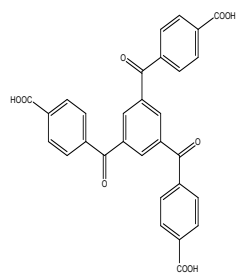

36.

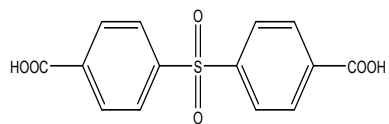

37.

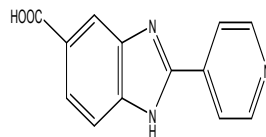

38.

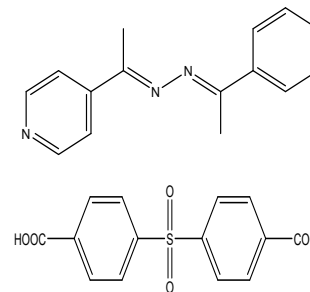

39.

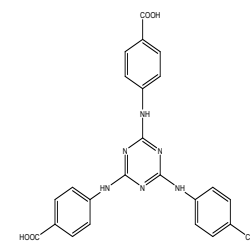

40.

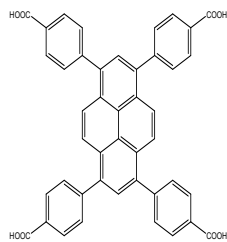

41.

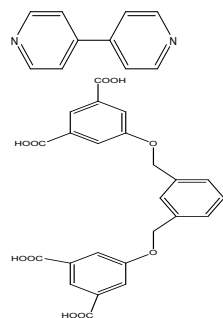

42.

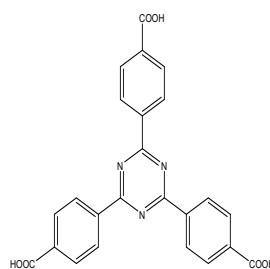

43.

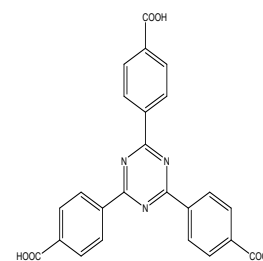

44.

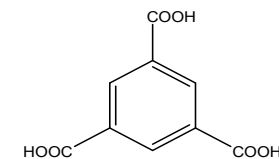

45.

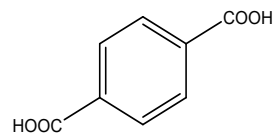

46.

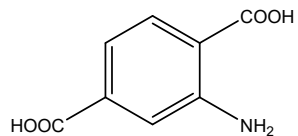

47.

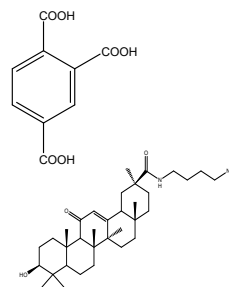

48.

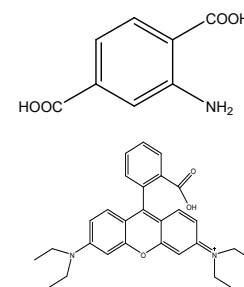

49.

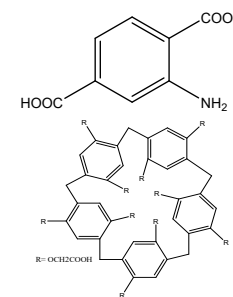

50.

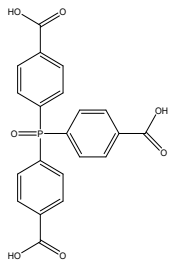

51.

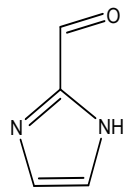

52.

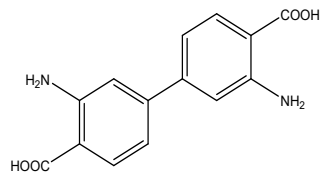

53.

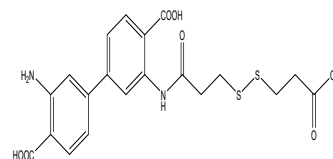

54.

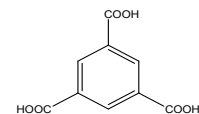

55.

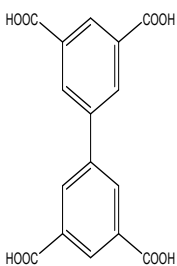

56.

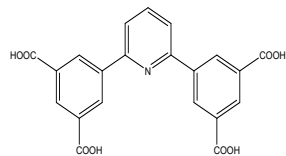

57.

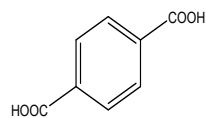

58.

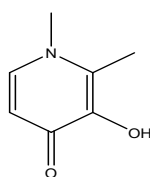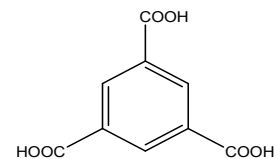

59.

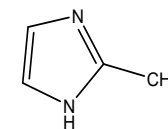

60.

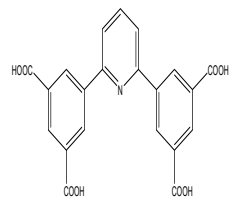

61.

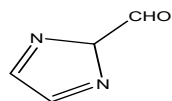

62.

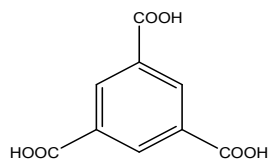

63.

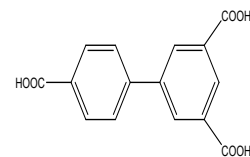

64.

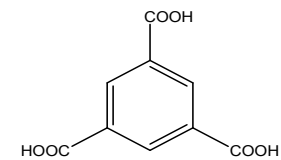

65.

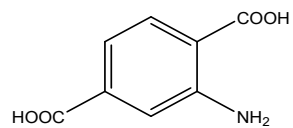

66.

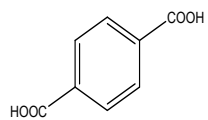

67.

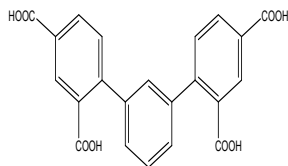

68.

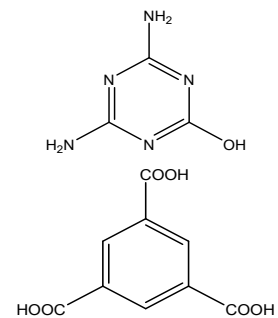

69.

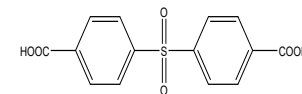

70.

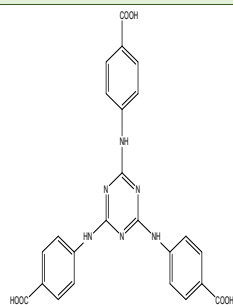

71.

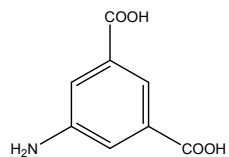

72.

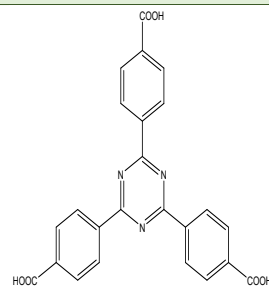

73.

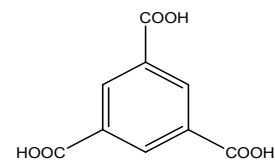

74.

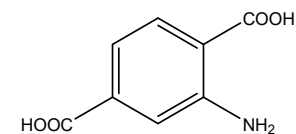

75.
